# Supplementary material for: Calcium Stimulates Self-Assembly of Protein Kinase C α In Vitro
Source: PLoS One. 2016 Oct 5;11(10):e0162331. doi: 10.1371/journal.pone.0162331 (PMC5051681; doi:10.1371/journal.pone.0162331)
Supplement: S2 Table — (XLSX) [file pone.0162331.s009.xlsx]

## Sheet: main data
Data availbility for PONE-D-16-16243R1
values from figures used for mean calculation and statistics
Fig. 1b
am-EGTA	am-EGTACa	am-EGTACaEGTA		amD246Negta	amD246NegtaCa	amD246NegtaCaEGTA		dPKCaeg	dPKCaegca	dPKCaegcaeg1
0.893196	7.54534	3.88445		0.888873	1.65905	1.16961		1.07996	7.73052	5.24443
1.00828	7.77904	3.18215		0.912645	1.8194	1.22158		1.12525	8.32432	5.52766
0.85727	9.45943	3.59104		1.02792	1.9476	1.15642		1.03691	8.89441	5.45017
1.05887	9.24227	4.08261		1.03811	1.66466	1.04381		1.36052	7.86108	5.04138
0.928732	10.8325	3.72134		0.910705	1.7894	1.05272		1.10925	10.313	4.57273
1.13153	11.6212	3.10716		1.19137	1.54366	1.00941		1.04534	9.48828	5.21625
1.11052	11.0542	3.14142		0.975338	1.60904	1.11958		1.05324	11.0071	5.87631
1.02262	10.9126	3.3606		0.96706	1.53123	1.14997		0.984816	10.3826	5.31219
0.96608	10.1878	3.74511						0.961293	9.9545	4.86173
1.02291	9.00728	4.0828						0.898319	9.02889	5.1989
Fig. 1c
spot# amEG	spot# amEGCA	spot# amEGCAEG	%Clustered-ameg	%Clustered-amEGCA	%Clustered-amEGCAEG
44	434	116	1.0238	38.3242	4.23819
58	416	117	1.53326	33.7693	4.12555
61	421	126	1.83781	37.6396	4.92901
52	441	118	1.4	39	4.4
35	434	118	0.8	38.6	4.4
69	420	121	2.2	34.6	4.6
Fig. 1d
[free calcium]	Spot number					Ultra fraction of total in pellet
1.6e-09	21	20	16	20	21	0.168896	0.266307	0.229942
1.96e-08	11	20	17	19	14	0.160366	0.277262	0.240422
1.18e-07	13	19	15	13	14	0.207258	0.292406	0.24567
6.96e-07	71	52	76	69	81	0.360412	0.368236	0.310929
6.25e-06	167	129	159	171	143	0.405881	0.396452	0.368609
0.0001	183	196	183	198	194	0.383509	0.450582	0.404527
Fig. 1e
EGTA	Calcium
0.138453	0.371788
0.232449	0.493661
0.13114	0.564282
0.108631	0.350941
Fig. 2
Full EGTA	Full calcium	RD EGTA	RD calcium	C2 EGTA	C2 calcium
1.00412	5.3433	0.989341	2.4399	0.914694	1.43684
0.974926	5.52871	1.07233	2.68228	0.994646	1.35182
1.07552	6.27084	0.989254	2.52351	1.00255	1.33243
1.01833	5.6063	0.935609	2.33215	0.990358	1.43514
1.02452	5.53052	0.986947	2.33656	0.954255	1.34746
0.956718	5.3607	0.991969	2.30694	0.979654	1.28164
0.972294	5.68067	0.951057	2.91671	0.988417	1.47097
0.970978		1.17311	2.82266	1.08525	1.44522
1.00259		0.987326	2.8007	0.906916	1.37888
		0.923052	2.94005	0.979435	1.38461
				0.884382	1.40384
				1.04137	1.33829
				1.1035	1.41135
				0.908184	1.42664
				1.0764	1.35936
				1.06369	1.43188
				0.972252	1.35372
				1.11017	1.52784
				1.05009	1.35478
				0.993785	1.43012
Fig. 3b
c1ac2-eg-mCit	c1ac2-ca-mCit	c1ac2-TEV-ca-mCit	c1ac2-TEV-ca-mCer	c1bc2-eg-mCit	c1bc2-ca-mCit
9	50	7	7	9	13
7	52	7	7	15	11
12	47	7	1	11	6
7	34	10	12	10	14
7	57	9	8	1	9
6	49	9	5	10	13
Fig. 3d
c1a10egta	c1a20egta	c1a30egta	C1a10TEVegta
0.808557	0.684176	0.67027	0.655507
0.842	0.687446	0.679885	0.657313
0.827217	0.695121	0.684734	0.659921
0.829435	0.685253	0.682986	0.660685
0.829505	0.676654	0.680498	0.656277
0.829118	0.686694	0.68324	0.655836
	0.676329	0.682272	0.663906
	0.687605	0.680557	0.664287
	0.675758	0.684263	0.664357
	0.669352	0.69405	0.656451
	0.684017	0.683857	0.660139
	0.675356	0.692256	0.656418
Fig. 3e
FRET c1a-10-c2 pre	FRET c1a-10-c2 calcium	FRET c1a-10-c2 calcium EGTA	FRET TEV c1a-10-c2 pre	FRET TEV c1a-10-c2 calcium	FRET TEV c1a-10-c2 calcium EGTA	FRET c1a-10-c2 D246Npre	FRET c1a-10-c2 D246Ncalcium	FRET c1a-10-c2 D246NcalEGTA
0.942564	1.12899	1.04455	0.702612	0.723326	0.723155	0.841824	0.870521	0.853835
0.938206	1.14135	1.029	0.709187	0.732989	0.723682	0.829889	0.850688	0.877086
0.953535	1.13501	1.02461	0.712516	0.726691	0.72956	0.8321	0.865599	0.876313
0.970001	1.14567	1.01383	0.720026	0.721705	0.718187	0.843629	0.87756	0.89973
0.970549	1.09357	0.98794	0.679986	0.696615	0.68128	0.840932	0.874456	0.89122
0.965487	1.11733	0.989115	0.695163	0.70959	0.681705	0.839893	0.886733	0.889639
0.976426	1.10635	0.982866	0.698175	0.703505	0.682335	0.838936	0.864172	0.888396
0.981324	1.11447	0.988275	0.697097	0.70309	0.680244	0.830181	0.856523	0.875725
0.850039	1.025	0.921811	0.688006	0.685173	0.688373	0.831289	0.872143	0.889982
0.847377	1.03118	0.911302	0.672297	0.695371	0.700207
0.863845	1.0298	0.927268	0.669887	0.689647	0.695599
0.852264	1.04492	0.916476	0.67747	0.688999	0.700972
Fig. 3f
c1ac2 concentartion (nM)	deltaFRET
25	0.027735	0.042945	0.039115	0.057295	0.047566	0.025454	0.010617	0.029449
50	0.133677	0.135937	0.148505	0.13275	0.136494	0.125521	0.123439	0.11677
100	0.245627	0.275215	0.25016	0.262217	0.262067	0.272015	0.25699	0.263369
200	0.3133	0.330311	0.318696	0.328941	0.31076	0.329698	0.325995	0.327952
400	0.324602	0.329302	0.333104	0.338564	0.336075	0.351633	0.34964	0.346019
Fig. 3g
spot# 10	spot#20	spot#30	spot#c1bc210		intesity10	intesity20	intesity30	intesityc1b10
101	47	30	13		0.0449521	0.038355	0.0800732	0.0516409
162	39	20	17		0.06616	0.0465975	0.0890771	0.040267
175	49	35	44		0.0683429	0.0469885	0.0769051	0.0326671
173	48	25	21		0.0638224	0.0492504	0.0608773	0.0271202
166	57	37	24		0.0579359	0.0502571	0.0789118	0.0365737
174	47	35	6		0.0635799	0.0518945	0.0910086	0.103771
155	35	32	8		0.0626472	0.0539497	0.0654957	0.0959339
166	53	40	8		0.0681732	0.0565749	0.0712602	0.0910209
181	48	41	9		0.0631997	0.0482077	0.0634958	0.0858432
150	41	38	6		0.0575254	0.0459836	0.0757553	0.0817977
154	42	38			0.0655571	0.041486	0.0699756
123	40	34			0.0447782	0.0340571	0.0614099
117	44	33			0.0442891	0.0456425	0.0706742
	51	42				0.0492155	0.0586504
	46	33				0.0552949	0.0744883
		35					0.0850363
		38					0.0783379
Fig. 4b
am no lipidpre	am no lipidcalcium	AM no lipidcalEGTA	am pcpsDOpre	am pcpsDOcalcium	am pcpsDOcalEGTA	C1aC2anis sample pre	C1aC2 anis sample calcium	C1aC2 anis sample calcium EGTA
0.341655	0.341405	0.341834	0.340205	0.310863	0.327046	0.324738	0.315712	0.320188
0.339041	0.343119	0.338981	0.339382	0.304546	0.326234	0.322663	0.308181	0.315265
0.343498	0.34734	0.341196	0.342194	0.308751	0.326926	0.32537	0.30675	0.320589
0.341404	0.344461	0.344559	0.334903	0.307467	0.326948	0.323211	0.310778	0.316974
0.346846	0.343448	0.341392	0.339883	0.309762	0.324304	0.327886	0.313446	0.318051
0.34268	0.338731	0.338431	0.336818	0.309179	0.330344	0.329413	0.31323	0.321879
0.344345	0.342067	0.343679	0.34114	0.310125	0.327042	0.322876	0.313619	0.31705
0.342627	0.340331	0.338885	0.332671	0.303461	0.328467	0.32238	0.322539	0.323838
0.334951	0.342373	0.339768	0.338412	0.307762	0.329269	0.329002	0.312318	0.329027
0.33814	0.341436	0.338837	0.33895	0.308021	0.331639	0.325211	0.31051	0.326134
0.343687	0.343378	0.339888	0.340663	0.307709	0.327658	0.336438	0.327269	0.332158
0.338514	0.344752	0.340189	0.335035	0.310617	0.32878	0.335046	0.323101	0.329937
0.33909	0.343887	0.339257	0.339302	0.301613	0.331441	0.338591	0.326994	0.335589
0.341477	0.340655	0.339364	0.335707	0.307212	0.331418	0.333379	0.32497	0.330006
0.338568	0.339252	0.337986	0.334199	0.307887	0.329246	0.336753	0.327091	0.331216
Fig. 4c
time (s)	red					black
0	0.333826	0.342641	0.346038			0.341018	0.343572	0.340783	0.342112	0.339786
40	0.339884	0.343549	0.346232			0.341857	0.341525	0.34088	0.338671	0.340622
80	0.349173	0.365721	0.376371			0.350421	0.320947	0.318624	0.313534	0.327507
120	0.335339	0.338949	0.342715			0.325161	0.331153	0.327793	0.327331	0.327048
160	0.336417	0.339845	0.344076			0.327866	0.323747	0.322652	0.320032	0.321188
200	0.335438	0.341068	0.337352			0.317908	0.326749	0.315388	0.322458	0.319584
240	0.333954	0.343564	0.340175			0.322231	0.318972	0.31862	0.317829	0.318048
280	0.333594	0.341241	0.339543			0.320159	0.320622	0.320345	0.314409	0.319946
320	0.332731	0.338776	0.34022			0.316824	0.320053	0.31473	0.315508	0.318786
360	0.329387	0.339852	0.343467			0.318542	0.317852	0.31901	0.316601	0.318507
400	0.331834	0.339984	0.342363			0.316649	0.319792	0.317446	0.314447	0.317239
440	0.331899	0.337049	0.341026			0.319048	0.31678	0.318213	0.312519	0.314659
480	0.330073	0.337105	0.341089			0.31601	0.314551	0.316122	0.31209	0.311055
520	0.330786	0.340805	0.339412			0.312393	0.322242	0.314028	0.314078	0.312132
560	0.332536	0.341254	0.338347			0.313388	0.316835	0.308988	0.312193	0.314166
600	0.329267	0.338977	0.340525			0.314181	0.313858	0.313994	0.310283	0.314406
640	0.33031	0.337244	0.337243			0.312117	0.314322	0.313942	0.311659	0.312696
680	0.329556	0.33901	0.33998			0.313058	0.31694	0.315649	0.310639	0.312799
720	0.33089	0.338171	0.339415			0.309542	0.314497	0.312543	0.30981	0.312339
760	0.330202	0.338812	0.342014			0.309765	0.316886	0.310987	0.309008	0.313291
800	0.332998	0.338873	0.340475			0.307845	0.315435	0.314647	0.312415	0.310673
840	0.330844	0.340834	0.340115			0.308007	0.314346	0.309342	0.305626	0.313146
880	0.33173	0.340203	0.342876			0.309916	0.315127	0.314342	0.308908	0.310798
920	0.330315	0.339625	0.339156			0.30408	0.311842	0.310791	0.308573	0.311032
960	0.328799	0.338661	0.341468			0.307736	0.31062	0.311709	0.309354	0.308581
1000	0.329813	0.339383	0.337777			0.30741	0.313289	0.311801	0.30586	0.311532
1040	0.326292	0.343344	0.342994			0.306548	0.309526	0.315856	0.307595	0.307118
1080	0.325811	0.337097	0.339459			0.303151	0.309444	0.311411	0.306357	0.310124
1120	0.329201	0.338946	0.339674			0.30456	0.30782	0.308344	0.304587	0.310392
1160	0.327706	0.341632	0.339889			0.304006	0.309833	0.31061	0.306968	0.308037
1200	0.329568	0.341978	0.340569			0.30474	0.309287	0.307419	0.305317	0.307659
1260	0.32966	0.344868	0.340469			0.32301	0.325644	0.327344	0.323513	0.32109
1300	0.328569	0.34314	0.338356			0.324608	0.32934	0.324951	0.326316	0.327716
1340	0.330773	0.344578	0.341539			0.321271	0.326699	0.324824	0.322514	0.328171
1380	0.3355	0.340654	0.343012			0.320309	0.330272	0.319509	0.327731	0.326957
1420	0.331671	0.342625	0.339418			0.320282	0.327428	0.324262	0.327186	0.323513
1460	0.334141	0.340601	0.340414			0.32237	0.332658	0.322232	0.323301	0.325977
1500	0.332612	0.339646	0.339204			0.323771	0.326148	0.325285	0.332358	0.326285
1540	0.333571	0.339702	0.341492			0.323509	0.330313	0.323619	0.331232	0.327503
1580	0.332243	0.342164	0.33639			0.324129	0.330148	0.324291	0.329686	0.330745
1620	0.333915	0.340466	0.338593			0.328225	0.330837	0.327305	0.329626	0.328223
1660	0.333283	0.340572	0.341544			0.328939	0.33281	0.330341	0.32549	0.327038
1700	0.333479	0.342636	0.337958			0.327548	0.332482	0.331746	0.331156	0.329003
1740	0.330566	0.338947	0.34036			0.329421	0.329652	0.329138	0.328213	0.331448
1780	0.330814	0.341056	0.339174			0.326633	0.332185	0.330226	0.328265	0.327081
1820	0.332795	0.342459	0.337108			0.32985	0.329551	0.330735	0.330998	0.325364
1860	0.334259	0.34047	0.340133			0.326107	0.333195	0.329936	0.330397	0.329668
1900	0.33469	0.339726	0.340098			0.329333	0.333193	0.334995	0.330794	0.327746
1940	0.33257	0.33836	0.335958			0.330438	0.335257	0.333816	0.331109	0.330394
1980	0.330195	0.340621	0.336788			0.327366	0.333613	0.330172	0.32943	0.33056
2020	0.329362	0.338632	0.340727			0.33093	0.335509	0.329901	0.329769	0.329558
2060	0.331429	0.340961	0.339267			0.325639	0.334127	0.333529	0.328611	0.332037
2100	0.331432	0.335711	0.343195			0.324966	0.328639	0.330508	0.330303	0.327185
2140	0.330152	0.340644	0.336643			0.324242	0.333259	0.333475	0.327383	0.329688
2180	0.331668	0.340276	0.339844			0.32526	0.331949	0.332944	0.328334	0.325414
2220	0.329651	0.337544	0.340224			0.32598	0.331034	0.329287	0.33075	0.327607
2260	0.32844	0.334297	0.34041			0.327333	0.333518	0.329397	0.329902	0.327901
2300	0.330504	0.334974	0.34288			0.327856	0.331149	0.334884	0.327986	0.329238
2340	0.334405	0.335803	0.338125			0.32918	0.332107	0.332274	0.329621	0.330354
2380	0.33148	0.336388	0.338302			0.328493	0.330655	0.324879	0.328646	0.333783
2420	0.329486	0.335602	0.334823			0.325849	0.32955	0.332184	0.325618	0.328058
2460	0.329366	0.337181	0.332425			0.326472	0.332506	0.330186	0.331046	0.329534
Fig. 5c
seconds	corrcoef1	corrcoef2	corrcoef3	corrcoef4	anis1	anis2	anis3	anis4		Corr Coef tao	Anis tao
0	1	1	1	1	0.252991	0.252762	0.254393	0.256843		11.73	1.57
0.5	0.999587	0.999017	0.999302	0.999694	0.252433	0.253424	0.253596	0.257406		11.59	0.2348
1	0.999569	0.999079	0.999298	0.999644	0.252608	0.252598	0.253998	0.256546		14.41	1.197
1.5	0.999548	0.999096	0.999287	0.999664	0.252944	0.252116	0.253426	0.256378		4.361	0.4319
2	0.999549	0.999066	0.999271	0.999678	0.252512	0.253025	0.253559	0.257302
2.5	0.999537	0.999006	0.999263	0.999674	0.252386	0.252725	0.254179	0.256601
3	0.999521	0.999063	0.99926	0.999669	0.252585	0.252362	0.254333	0.257662
3.5	0.99951	0.999054	0.999245	0.999621	0.252554	0.253568	0.254424	0.255632
4	0.999512	0.999048	0.999242	0.999595	0.252149	0.25325	0.254621	0.257035
4.5	0.999494	0.998909	0.999227	0.999623	0.253114	0.253176	0.254249	0.257425
5	0.999479	0.998994	0.9992	0.999581	0.252757	0.252682	0.254634	0.256782
5.5	0.999471	0.99897	0.999192	0.999571	0.252509	0.253428	0.255398	0.256592
6	0.99946	0.999049	0.999187	0.999552	0.253168	0.25277	0.254319	0.256977
6.5	0.999442	0.999037	0.999185	0.999549	0.252939	0.252723	0.254333	0.257667
7	0.99944	0.999041	0.99916	0.999538	0.252537	0.2536	0.254263	0.257033
7.5	0.999424	0.999023	0.999139	0.999548	0.252883	0.252195	0.25416	0.257088
8	0.999424	0.999009	0.999133	0.999607	0.253493	0.251986	0.253695	0.256435
8.5	0.999412	0.998947	0.999125	0.99951	0.252752	0.253108	0.254314	0.256342
9	0.9994	0.998981	0.99908	0.99954	0.252944	0.252677	0.254279	0.255253
9.5	0.999262	0.994703	0.992381	0.992542	0.25091	0.253463	0.253765	0.25776
10	0.997267	0.995351	0.994707	0.977782	0.23786	0.247699	0.251203	0.254495
10.5	0.993935	0.993302	0.994032	0.990899	0.230073	0.243424	0.246367	0.2459
11	0.991258	0.991486	0.992783	0.991931	0.226949	0.242894	0.244058	0.24497
11.5	0.98912	0.989956	0.991896	0.991971	0.225186	0.243153	0.243372	0.244947
12	0.987292	0.988734	0.991093	0.991831	0.224902	0.244575	0.243367	0.243428
12.5	0.985707	0.987776	0.990757	0.992088	0.224659	0.243616	0.242692	0.243821
13	0.9844	0.986862	0.99016	0.991439	0.223605	0.243781	0.243293	0.243673
13.5	0.983272	0.985987	0.989718	0.991224	0.223608	0.242937	0.242294	0.242635
14	0.982097	0.985273	0.98931	0.991086	0.22334	0.242857	0.241945	0.243054
14.5	0.981214	0.984618	0.98894	0.99093	0.223812	0.242727	0.242052	0.241942
15	0.98032	0.984158	0.988542	0.990738	0.222684	0.242844	0.242267	0.242656
15.5	0.979469	0.983769	0.988285	0.990664	0.223307	0.243331	0.242321	0.242561
16	0.978673	0.983091	0.98787	0.990575	0.222871	0.242835	0.242001	0.242047
16.5	0.978054	0.982821	0.987661	0.990413	0.222242	0.243653	0.241562	0.242092
17	0.977399	0.982308	0.987298	0.990241	0.222186	0.242897	0.24245	0.242373
17.5	0.976751	0.982001	0.986921	0.99017	0.222301	0.242868	0.242932	0.242335
18	0.976057	0.981487	0.986714	0.990044	0.222139	0.244078	0.241788	0.242708
18.5	0.975493	0.981195	0.986452	0.989918	0.221488	0.244427	0.242417	0.243411
19	0.974916	0.980827	0.986248	0.989726	0.221777	0.24321	0.242841	0.242516
19.5	0.974451	0.98049	0.98593	0.989599	0.22146	0.24244	0.241834	0.242528
20	0.973914	0.980243	0.985747	0.989475	0.221048	0.242881	0.24135	0.24238
20.5	0.973488	0.979977	0.985448	0.989439	0.220875	0.242969	0.241894	0.241779
21	0.973037	0.979576	0.985247	0.989216	0.220752	0.243533	0.241648	0.241837
21.5	0.972583	0.979299	0.984897	0.989202	0.220214	0.243193	0.2416	0.241951
22	0.97209	0.979269	0.984859	0.989145	0.220718	0.242908	0.241842	0.242061
22.5	0.97172	0.97887	0.984573	0.989113	0.22069	0.24263	0.241789	0.241993
23	0.971456	0.978563	0.984396	0.989004	0.219833	0.243189	0.241296	0.241687
23.5	0.970893	0.978168	0.984101	0.988919	0.220136	0.243217	0.241868	0.241538
24	0.970445	0.978082	0.983898	0.988857	0.220127	0.242753	0.241367	0.241945
24.5	0.970183	0.977884	0.983679	0.988749	0.220587	0.242539	0.241763	0.242306
25	0.9698	0.977576	0.983528	0.988641	0.219995	0.243858	0.242015	0.242262
25.5	0.969428	0.977421	0.983363	0.988582	0.219284	0.243246	0.241768	0.242633
26	0.969105	0.97717	0.983206	0.988499	0.219556	0.244744	0.241517	0.242041
26.5	0.968707	0.976899	0.982993	0.988407	0.220204	0.243966	0.241474	0.24195
27	0.968401	0.976858	0.982883	0.988245	0.219446	0.24309	0.24162	0.24185
27.5	0.9681	0.976697	0.982684	0.988286	0.220007	0.242879	0.241647	0.241405
28	0.967874	0.976462	0.982468	0.988231	0.219052	0.243004	0.241842	0.242255
28.5	0.967651	0.976167	0.982258	0.988094	0.219508	0.242862	0.241979	0.242214
29	0.967245	0.975971	0.982077	0.988048	0.218791	0.242065	0.241663	0.242047
29.5	0.967045	0.975963	0.982027	0.987948	0.21964	0.242741	0.241975	0.242631
30	0.966805	0.975495	0.981767	0.987969	0.218991	0.242983	0.24201	0.241564
30.5	0.966469	0.975415	0.98168	0.987901	0.218349	0.243205	0.241605	0.242233
31	0.966205	0.975235	0.981421	0.987939	0.219545	0.243215	0.241219	0.241566
31.5	0.966015	0.975127	0.981431	0.987844	0.218705	0.24315	0.241569	0.24239
32	0.96576	0.975043	0.98125	0.987766	0.218566	0.242508	0.241252	0.242558
32.5	0.965462	0.974819	0.981097	0.987766	0.218194	0.243014	0.240468	0.242365
33	0.96514	0.974614	0.980958	0.987709	0.218719	0.242518	0.241415	0.241905
33.5	0.964843	0.97444	0.980859	0.987671	0.218313	0.242905	0.240894	0.242549
34	0.964717	0.974462	0.980752	0.987605	0.218227	0.24193	0.241478	0.242844
34.5	0.964383	0.974187	0.980533	0.987648	0.218069	0.241678	0.241744	0.24196
35	0.96416	0.973908	0.980494	0.987596	0.218433	0.242338	0.24149	0.242722
35.5	0.963973	0.973843	0.980358	0.987556	0.218523	0.242673	0.240342	0.243071
36	0.963689	0.973722	0.980148	0.987575	0.218929	0.242926	0.241141	0.242854
36.5	0.963506	0.97354	0.980001	0.987537	0.218403	0.24259	0.241183	0.243118
37	0.963313	0.97332	0.979903	0.987531	0.217849	0.24258	0.24127	0.242989
37.5	0.963046	0.972919	0.979862	0.98756	0.217497	0.241408	0.24138	0.242966
38	0.962777	0.972955	0.979688	0.987519	0.218382	0.242904	0.24073	0.244946
38.5	0.962549	0.972881	0.979549	0.987566	0.218661	0.242641	0.24149	0.242839
39	0.962362	0.972747	0.979365	0.987574	0.218142	0.243784	0.240666	0.24297
39.5	0.962132	0.972709	0.979288	0.987648	0.217542	0.242945	0.241663	0.243585
40	0.962065	0.972331	0.979223	0.987662	0.218239	0.243145	0.241695	0.243235
40.5	0.961859	0.972159	0.979032	0.987701	0.218407	0.242247	0.241304	0.244104
41	0.961625	0.972236	0.978966	0.987719	0.216744	0.242277	0.241469	0.244643
41.5	0.961393	0.97184	0.978929	0.987792	0.218118	0.241552	0.241402	0.244872
42	0.961265	0.971899	0.978755	0.987909	0.217227	0.243433	0.241526	0.244016
42.5	0.961141	0.971871	0.978548	0.987969	0.217821	0.24183	0.240899	0.245097
43	0.961038	0.971306	0.978539	0.987974	0.217558	0.24289	0.241578	0.244954
43.5	0.960849	0.971201	0.978306	0.988031	0.216923	0.242027	0.241657	0.244311
44	0.960689	0.971016	0.978201	0.988133	0.217064	0.242133	0.240689	0.2457
44.5	0.960543	0.971221	0.978255	0.988259	0.217157	0.242633	0.241708	0.244316
45	0.960322	0.971062	0.977978	0.988273	0.21763	0.242061	0.24172	0.245962
45.5	0.960089	0.971057	0.977966	0.988362	0.217428	0.242374	0.240274	0.245134
46	0.959906	0.970774	0.977824	0.988455	0.21752	0.243193	0.241652	0.244371
46.5	0.959797	0.970513	0.977637	0.988638	0.216896	0.241083	0.241592	0.246017
47	0.959707	0.970714	0.977544	0.988796	0.217443	0.242505	0.240731	0.245654
47.5	0.959488	0.970496	0.977426	0.988938	0.217957	0.242116	0.2415	0.246328
48	0.959391	0.970301	0.977256	0.988994	0.217832	0.243189	0.241441	0.24725
48.5	0.95931	0.970196	0.976738	0.989171	0.217146	0.242994	0.240918	0.24636
49	0.959048	0.969669	0.976952	0.989367	0.216962	0.242461	0.24177	0.246895
49.5	0.958931	0.969743	0.976789	0.989493	0.216927	0.242065	0.241366	0.247877
Fig. 6a
no lipidpre	pcpspre	pcpsDOpre	pcpsPIP2pre	pcpsDOPIP2pre	no lipidcalcium	pcpscalcium	pcpsDOcalcium	pcpsPIP2calcium	pcpsDOPIP2calcium	no lipidcalEGTA	pcpscalEGTA	pcpsDOcalEGTA	pcpsPIP2calEGTA	pcpsDOPIP2calEGTA
0.341655	0.339183	0.340205	0.343529	0.335754	0.341405	0.318341	0.310863	0.315091	0.305455	0.341834	0.322502	0.327046	0.338956	0.336097
0.343498	0.34031	0.342194	0.343236	0.340091	0.34734	0.32244	0.308751	0.314794	0.306752	0.341196	0.322975	0.326926	0.3409	0.341646
0.346846	0.340301	0.339883	0.344551	0.337331	0.343448	0.320937	0.309762	0.312947	0.305192	0.341392	0.31966	0.324304	0.340514	0.338683
0.344345	0.341043	0.34114	0.340317	0.338239	0.342067	0.322872	0.310125	0.314585	0.306606	0.343679	0.317337	0.327042	0.3402	0.337876
0.334951	0.343605	0.338412	0.346682	0.339901	0.342373	0.32662	0.307762	0.315817	0.302409	0.339768	0.33199	0.329269	0.341918	0.338082
0.33814	0.342483	0.33895	0.341213	0.341878	0.341436	0.324546	0.308021	0.31243	0.306012	0.338837	0.339079	0.331639	0.337772	0.340453
0.343687	0.339578	0.340663	0.34345	0.340377	0.343378	0.329538	0.307709	0.315415	0.304637	0.339888	0.33539	0.327658	0.339008	0.338435
0.338514	0.343863	0.335035	0.345631	0.344654	0.344752	0.327399	0.310617	0.316406	0.308253	0.340189	0.33549	0.32878	0.341662	0.336585
0.33909	0.338609	0.339302	0.343469	0.341109	0.343887	0.332142	0.301613	0.31532	0.305777	0.339257	0.341837	0.331441	0.339738	0.336705
0.341477	0.341868	0.335707	0.344734	0.34142	0.340655	0.326291	0.307212	0.314406	0.309038	0.339364	0.334033	0.331418	0.341861	0.339713
0.338568	0.345795	0.334199	0.346359	0.336025	0.339252	0.324077	0.307887	0.312484	0.306206	0.337986	0.339932	0.329246	0.336563	0.337095
0.338701	0.341038	0.335483	0.348243	0.339077	0.340331	0.325847	0.3094	0.313694	0.306419	0.3422	0.334669	0.332271	0.339542	0.336014
Fig. 6b
no lipids	PCPS	PCPS2%DO	PSPC2%PIP2	PCPS1%DO1%PIP2
1.56039	27.4271	57.8434	29.7209	82.1841
7.73086	19.1619	53.4644	32.3464	78.3548
9.79718	12.8398	51.0379	25.8631	91.871
21.6357	23.8727	62.5637	40.3841	85.8617
16.5837	14.4226	62.5258	30.2422	97.9467
21.8917	30.0621	61.4547	39.5785	65.2366
19.1903	29.3702	55.0662	34.4316	92.5156
Fig. 6c
no lipidpre	pcpspre	pcpsDOpre	pcpsPIP2pre	pcpsDOPIP2pre
0.338156	0.334214	0.334002	0.337516	0.341231	no lipidcalcium	pcpscalcium	pcpsDOcalcium	pcpsPIP2calcium	pcpsDOPIP2calcium	no lipidcalEGTA	pcpscalEGTA	pcpsDOcalEGTA	pcpsPIP2calEGTA	pcpsDOPIP2calEGTA
0.340463	0.337927	0.340091	0.337977	0.340514	0.34192	0.336286	0.339776	0.29625	0.303398	0.342139	0.338391	0.339017	0.337811	0.3395
0.338712	0.334922	0.332154	0.337446	0.339692	0.342677	0.330054	0.340748	0.293612	0.301048	0.33971	0.339397	0.338728	0.334872	0.337069
0.337799	0.337881	0.333735	0.338678	0.342765	0.343131	0.332869	0.34264	0.291677	0.303614	0.344584	0.338131	0.335653	0.344989	0.340612
0.337787	0.339702	0.335929	0.33804	0.33832	0.342915	0.329454	0.336325	0.29897	0.303953	0.344605	0.339332	0.34013	0.342039	0.338653
0.336754	0.336835	0.33757	0.338617	0.340621	0.343419	0.336379	0.343115	0.292727	0.303204	0.345273	0.343005	0.340057	0.339706	0.33676
0.335695	0.337252	0.336723	0.337129	0.340953	0.344258	0.329353	0.338471	0.296146	0.306215	0.345752	0.340127	0.339977	0.340872	0.344304
0.34291	0.331667	0.338997	0.340603	0.340115	0.342437	0.333682	0.341175	0.296039	0.304525	0.342591	0.342608	0.34051	0.335007	0.339457
0.340145	0.336314	0.340308	0.338283	0.337693	0.34455	0.330787	0.339564	0.296254	0.301587	0.341778	0.342888	0.341881	0.339256	0.338827
0.339468	0.337989	0.33987	0.338959	0.333463	0.341353	0.332835	0.335439	0.294086	0.296202	0.337518	0.341943	0.339648	0.338485	0.341794
0.337047	0.338384	0.334339	0.337495	0.337296	0.342628	0.325308	0.33941	0.295879	0.297906	0.342509	0.339673	0.341159	0.340614	0.33895
0.34427	0.336971	0.339506	0.336384	0.335003	0.340155	0.334998	0.335539	0.294939	0.303777	0.339763	0.340552	0.341454	0.339556	0.340951
0.336299	0.34133	0.337755	0.33926	0.335563	0.342798	0.329676	0.343132	0.291467	0.300388	0.342762	0.337645	0.339446	0.340273	0.341335
0.340728	0.33787	0.339111	0.335077	0.339437	0.343429	0.330232	0.33921	0.293964	0.302689	0.340715	0.345816	0.342296	0.342737	0.336786
0.336535	0.338888	0.337365	0.337269	0.340191	0.343606	0.327888	0.343124	0.293252	0.300238	0.339245	0.341432	0.342617	0.341443	0.339129
0.341385	0.334347	0.335543	0.339743	0.334704	0.339831	0.332302	0.338072	0.298999	0.303077	0.339615	0.342041	0.338307	0.339716	0.338134
					0.344536	0.330635	0.339543	0.295769	0.299028	0.341071	0.341191	0.339987	0.339371	0.339902
Fig. 6d
no lipidpre	pcpspre	pcpsDOpre	pcpsPIP2pre	pcpsDOPIP2pre
0.338906	0.336113	0.329795	0.340645	0.336758	no lipidcalcium	pcpscalcium	pcpsDOcalcium	pcpsPIP2calcium	pcpsDOPIP2calcium	no lipidcalEGTA	pcpscalEGTA	pcpsDOcalEGTA	pcpsPIP2calEGTA	pcpsDOPIP2calEGTA
0.337125	0.334573	0.327854	0.338867	0.338694	0.340658	0.322771	0.313492	0.342715	0.331448	0.342344	0.334276	0.331097	0.336229	0.335645
0.341361	0.340199	0.329792	0.339071	0.339763	0.343341	0.323671	0.312411	0.340754	0.32527	0.342537	0.335912	0.325904	0.339518	0.333295
0.337868	0.337494	0.326586	0.333967	0.33804	0.335646	0.321426	0.317239	0.341525	0.327669	0.339833	0.333174	0.325638	0.34191	0.336381
0.331468	0.344668	0.324964	0.346211	0.334652	0.341556	0.320994	0.315954	0.338992	0.329332	0.342343	0.336653	0.322843	0.338636	0.337756
0.339091	0.338502	0.328813	0.338481	0.34141	0.335966	0.326005	0.305991	0.339225	0.320938	0.333587	0.342698	0.326379	0.340867	0.325612
0.332894	0.342968	0.324969	0.346492	0.328394	0.339844	0.325647	0.311003	0.339029	0.32536	0.339612	0.335591	0.323834	0.336976	0.331094
0.339214	0.338161	0.328712	0.340118	0.337473	0.337728	0.328315	0.310113	0.340902	0.324988	0.338445	0.339464	0.320746	0.35007	0.328121
0.337885	0.343409	0.33042	0.349015	0.32883	0.339638	0.322566	0.311644	0.337515	0.323041	0.340932	0.340353	0.32567	0.338941	0.333092
0.339577	0.33816	0.330879	0.335871	0.339502	0.335993	0.32416	0.306298	0.342473	0.3249	0.336715	0.34275	0.323174	0.34387	0.324537
0.336968	0.341493	0.327017	0.345676	0.331154	0.340931	0.320958	0.310048	0.340945	0.3243	0.339868	0.335549	0.322024	0.339398	0.334647
0.34099	0.339305	0.331887	0.342381	0.337097	0.340169	0.327142	0.310181	0.342225	0.317636	0.338632	0.336831	0.321871	0.34454	0.323119
					0.337669	0.321905	0.309572	0.33932	0.324229	0.338835	0.332993	0.325256	0.336627	0.335684
Sfig. 3
conc (nM)	10min spot number									60min spot number									180min spot number									10min Norm mean intensity									60min Norm mean intensity									180min Norm intensity
75	69	61	66	87	90	87				111	122	125	120	119	118				110	119	143	146	158	145				0.012485	0.00995	0.010028	0.013605	0.011572	0.018196				0.013885	0.012497	0.012133	0.015265	0.014997	0.01185				0.017367	0.017199	0.018567	0.018705
100	66	84	73	58	68	70				140	158	159	137	146	168				142	112	136	125	120	149				0.010635	0.011707	0.009017	0.014455	0.006338	0.014972				0.01868	0.020242	0.017306	0.017676	0.019154	0.017273				0.025725	0.021903	0.024969	0.024449
150	118	129	154	122	88	93				134	132	127	119	113	128				68	71	64	83	78	91				0.010469	0.0104	0.014628	0.014594	0.010295	0.009947				0.02417	0.025037	0.027971	0.022591	0.029734	0.027738				0.026949	0.031773	0.026839	0.03164
250	151	142	160	153	182	175				88	76	83	82	85	76				44	44	39	56	39	48				0.01222	0.01251	0.012498	0.014031	0.011911	0.013513				0.040341	0.053367	0.043536	0.042005	0.043212	0.050602				0.046182	0.064642	0.068442	0.051896
450	149	155	157	140	158	126				35	35	31	39	38	34				25	41	24	27	40	42				0.016515	0.014578	0.015409	0.016229	0.016936	0.015671				0.088913*	0.073571*	0.111692*	0.074797*	0.072627*	0.084959*				0.094398*	0.045218*	0.097407*	0.095377*
Sfig. 5b
s102ca-splitmCit-100x-1.nd2	s102TEVca-splitmCit-100x-1.nd2	s10c2k2ca-splitmCit-100x-1.nd2	s10c2kTEV2ca-splitmCit-100x-1.nd2	s10ps2ca-splitmCit-100x-1.nd2	s10ps2TEVca-splitmCit-100x-1.nd2	s102ca-splitmCer-100x-1.nd2	s102TEVca-splitmCer-100x-1.nd2	s10c2k2ca-splitmCer-100x-1.nd2	s10c2kTEV2ca-splitmCer-100x-1.nd2	s10ps2ca-splitmCer-100x-1.nd2	s10ps2TEVca-splitmCer-100x-1.nd2
1.23529	0.647059	0.568421	0.568421	1.12587	0.993007	1.10345	2.16092	0.666667	0.361905	1.14226	0.194561
0.529412	0.764706	0.589474	0.568421	0.93007	0.993007	0.643678	1.1954	0.761905	0.533333	0.853556	0.307531
0.941176	0.647059	1.13684	0.568421	0.944056	1.3007	1.01149	1.65517	1.12381	0.285714	1.00418	0.332636
1.29412	0.764706	1.70526	0.484211		1.25874	1.24138	0.965517	1.44762	0.72381		0.332636
Sfig. 6
WTpre	WTcalcium	WTcaEGTA	D55Apre	D55Acalcium	D55AcaEGTA	R252Apre	R252Acalcium	R252AcaEGTA
0.792133	0.920432	0.783805	0.893755	1.04148	0.913063	0.858291	0.996625	0.838648
0.801042	0.927091	0.804202	0.897239	1.02952	0.901418	0.836102	0.983976	0.83681
0.830657	0.953033	0.823	0.91732	1.04861	0.921651	0.85031	1.00021	0.822714
0.844914	0.959847	0.82504	0.929608	1.05103	0.921805	0.825915	0.981932	0.822282
0.821693	0.955283	0.826401	0.913435	1.05096	0.919442	0.85102	0.982559	0.822472
0.840139	0.965067	0.836352	0.915512	1.044	0.915022	0.819208	0.9885	0.828447
0.828626	0.950917	0.826824	0.923419	1.03953	0.900706	0.854129	0.995606	0.825073
0.840346	0.958254	0.812238	0.901319	1.02644	0.912201	0.834811	0.983315	0.828335
Sfig. 7
TIME (s)	SAMPLE								CONTROL
0.751	0.510875			0.51561
0.8994					0.533755						0.507854
1.0498		0.499884				0.488307
1.2006			0.487703				0.50951
1.3518									0.45852	0.507802
1.5122
4.7854	0.516508			0.482342
4.943					0.546964						0.505933
5.0942		0.507845				0.502439
5.2454			0.498377				0.49925
5.3958									0.461148	0.516539
5.547
8.8166	0.504692			0.512174
8.9678					0.553981						0.511989
9.1286		0.479409				0.493911
9.2798			0.493305				0.517565
9.4406									0.489483	0.490394
9.5922
12.8342	0.528225			0.510645
12.9822					0.515672						0.541106
13.1342		0.512643				0.513646
13.2838			0.521829				0.504757
13.435									0.46829	0.509823
13.5958
16.8486	0.525848			0.503278
17.0062					0.540264						0.503556
17.1574		0.483039				0.512457
17.3086			0.498452				0.515379
17.459									0.463697	0.514679
17.6102
20.863	0.493195			0.518702
21.021					0.514168						0.492767
21.1814		0.512521				0.517106
21.3326			0.505452				0.513651
21.4846									0.453146	0.485084
21.6342
24.8974	0.529204			0.51061
25.0462					0.529686						0.510112
25.1966		0.521921				0.498483
25.357			0.50066				0.517008
25.5078									0.475564	0.514346
25.659
28.9222	0.513552			0.507506
29.0798					0.538139						0.491743
29.2302		0.489232				0.513973
29.3814			0.504889				0.501753
29.5322									0.459378	0.49217
29.6834
32.923*	0.390962*			0.376652*
33.0742*					0.40373*						0.498254*
33.235*		0.445454*				0.415031*
33.3854*			0.627929*				0.468951*
33.5366*									0.444166*	0.494051*
33.6882*
36.9506	0.596201			0.588452
37.0982					0.62715						0.506702
37.2502		0.598529				0.606475
37.4102			0.556577				0.549584
37.5606									0.480589	0.491834
37.7118
40.955	0.673331			0.610578
41.1126					0.678943						0.503712
41.2634		0.715479				0.632873
41.4174			0.587041				0.611743
41.575									0.481228	0.508473
41.7262
44.999	0.673325			0.633293
45.147					0.694142						0.520664
45.2978		0.739649				0.671633
45.4494			0.62898				0.64255
45.5998									0.469296	0.506974
45.7606
49.0438	0.710184			0.677119
49.191					0.714638						0.509052
49.3422		0.764637				0.691058
49.503			0.662189				0.630493
49.655									0.46109	0.492729
49.8054
53.0578	0.71951			0.694923
53.2166					0.674188						0.536191
53.3662		0.771006				0.703632
53.5174			0.6506				0.60654
53.6782									0.496348	0.512678
53.8294
57.1022	0.711416			0.66969
57.2498					0.701506						0.512556
57.4006		0.780432				0.651613
57.5518			0.676862				0.619167
57.703									0.472195	0.507845
57.8638
61.1062	0.710752			0.64586
61.2638					0.711887						0.504333
61.415		0.8127				0.694701
61.5662			0.708754				0.638056
61.7174									0.457836	0.518924
61.8678
65.1206	0.775999			0.674025
65.2798					0.7184						0.517365
65.4294		0.771471				0.701656
65.5802			0.729026				0.639437
65.7414									0.466681	0.517383
65.8922
69.135	0.72918			0.674315
69.283					0.700616						0.500821
69.4338		0.784636				0.730994
69.5946			0.733596				0.650462
69.7458									0.473912	0.508589
69.9066
73.1394	0.727956			0.682648
73.2974					0.697233						0.517563
73.4478		0.799805				0.727575
73.599			0.729864				0.643014
73.7498									0.474191	0.504187
73.9038
77.1638	0.753697			0.708166
77.3118					0.732092						0.498174
77.4726		0.761113				0.718144
77.6234			0.745076				0.668282
77.7742									0.484256	0.51627
77.9254
81.1982	0.762562			0.687138
81.3462					0.707359						0.517191
81.4974		0.796282				0.693033
81.6578			0.763765				0.649774
81.8098									0.475784	0.515832
81.9698
85.223	0.736267			0.694848
85.3814					0.721938						0.496573
85.5314		0.791536				0.713722
85.6822			0.770366				0.636829
85.8334									0.474416	0.496734
85.9846
89.2674	0.749905			0.713013
89.4254					0.712589						0.506782
89.5862		0.788652				0.755063
89.7382			0.762956				0.662519
89.8978									0.479229	0.518066
90.0486
93.3218	0.757601			0.700148
93.4694					0.716755						0.509271
93.6206		0.785923				0.684567
93.7714			0.792998				0.676517
93.9226									0.457848	0.52243
94.0834
97.3566	0.72703			0.704029
97.5142					0.708714						0.518177
97.665		0.758192				0.71461
97.8162			0.767655				0.6384
97.967									0.488797	0.507301
98.1182
101.391	0.733408			0.693227
101.549					0.728078						0.497587
101.7		0.733597				0.705755
101.851			0.754808				0.646307
102.011									0.4684	0.504589
102.162
105.435	0.7272			0.68899
105.583					0.728009						0.514869
105.734		0.763828				0.713364
105.885			0.763299				0.668843
106.037									0.469378	0.498913
106.197
109.47	0.769297			0.707481
109.618					0.726578						0.516925
109.769		0.788784				0.734726
109.929			0.765755				0.662934
110.081									0.490413	0.512593
110.232
113.525	0.72848			0.709715
113.682					0.721675						0.51399
113.837		0.765904				0.726164
113.994			0.770349				0.667607
114.155									0.48563	0.502098
114.306
117.569	0.718632			0.681541
117.717					0.721471						0.51359
117.878		0.749836				0.722541
118.029			0.771774				0.651315
118.18									0.485631	0.511835
118.331
121.604	0.713943			0.682467
121.751					0.730417						0.501362
121.902		0.760378				0.721411
122.063			0.780714				0.654123
122.215									0.477398	0.487151
122.375
125.618	0.753641			0.670623
125.777					0.724831						0.517467
125.927		0.773284				0.698221
126.078			0.762994				0.672953
126.229									0.474636	0.510585
126.381
129.633	0.724703			0.720129
129.781					0.724252						0.483187
129.941		0.749617				0.737395
130.092			0.766586				0.673007
130.243									0.464275	0.48982
130.394
133.687	0.733666			0.694934
133.835					0.735704						0.530618
133.986		0.748989				0.713449
134.148			0.784632				0.669728
134.298									0.478704	0.509479
134.449
137.681	0.729719			0.696422
137.841					0.698206						0.5181
137.99		0.761615				0.705877
138.141			0.791747				0.669573
138.302									0.482843	0.503677
138.454
141.706	0.725735			0.705642
141.853					0.753771						0.529165
142.005		0.754143				0.693938
142.155			0.788867				0.658398
142.307									0.486797	0.506193
142.467
145.721	0.730676			0.679216
145.868					0.74114						0.497774
146.019		0.766425				0.719396
146.18			0.778519				0.644316
146.331									0.458915	0.508404
146.482
149.725	0.715801			0.723304
149.883					0.743257						0.487389
150.033		0.756874				0.726985
150.185			0.768433				0.68606
150.346									0.488427	0.501949
150.496
153.7366*	0.627891*			0.433893*
153.8874*					0.516877*						0.467214*
154.0374*		0.526867*				0.509195*
154.1886*			0.52534*				0.48915*
154.3398*									0.439675*	0.48796*
154.5002*
157.753	0.618427			0.613356
157.911					0.63123						0.467019
158.062		0.650204				0.577154
158.213			0.633431				0.582372
158.364									0.477771	0.485702
158.515
161.788	0.566252			0.565912
161.946					0.592041						0.508795
162.106		0.629937				0.56992
162.257			0.58869				0.541915
162.419									0.488121	0.49825
162.569
165.802	0.555425			0.566838
165.951					0.573169						0.534719
166.101		0.56979				0.535425
166.261			0.576405				0.528201
166.413									0.446041	0.496813
166.573
169.827	0.542984			0.542447
169.984					0.57951						0.510178
170.135		0.56191				0.523497
170.286			0.54039				0.521516
170.437									0.471734	0.496383
170.588
173.851	0.530015			0.548812
174.009					0.544173						0.517049
174.169		0.55871				0.541385
174.321			0.568638				0.532116
174.473									0.474316	0.510048
174.622
177.903	0.545633			0.548893
178.053					0.555835						0.534092
178.204		0.546038				0.55023
178.355			0.535035				0.543797
178.507									0.478557	0.509072
178.667
181.92	0.530503			0.53195
182.078					0.546979						0.508044
182.229		0.524303				0.517478
182.38			0.534209				0.524466
182.53									0.470801	0.492673
182.681
185.934	0.551124			0.536454
186.082					0.546393						0.526831
186.243		0.54207				0.525814
186.393			0.552911				0.519782
186.545									0.472521	0.528456
186.695
189.935	0.52334			0.564264
190.086					0.553726						0.51605
190.237		0.541483				0.551915
190.398			0.523675				0.520913
190.549									0.48583	0.488911
190.701
193.963	0.539292			0.533131
194.121					0.549829						0.532388
194.273		0.525531				0.520932
194.422			0.544599				0.520949
194.583									0.483102	0.510159
194.734
198.007	0.526437			0.5335
198.155					0.543561						0.506391
198.316		0.533739				0.537841
198.467			0.529357				0.530879
198.618									0.476496	0.504668
198.769
202.021	0.525475			0.521378
202.169					0.532813						0.514679
202.32		0.528482				0.531035
202.481			0.537922				0.514767
202.633									0.465309	0.506893
202.783
206.016	0.542875			0.542338
206.174					0.54716						0.509974
206.324		0.544304				0.529763
206.475			0.526989				0.519423
206.636									0.481289	0.526446
206.787
210.04	0.541664			0.530651
210.188					0.541502						0.513306
210.339		0.517601				0.527184
210.489			0.5138				0.527784
210.641									0.468112	0.512761
210.801
214.054	0.549385			0.528278
214.212					0.531787						0.498401
214.363		0.517643				0.526615
214.515			0.537007				0.52656
214.665									0.465555	0.511237
214.816
218.058	0.525034			0.53515
218.207					0.540784						0.508816
218.367		0.517039				0.526422
218.518			0.525484				0.510008
218.669									0.463467	0.508789
218.82
222.103	0.514293			0.514428
222.251					0.543133						0.506864
222.402		0.502656				0.52163
222.562			0.504482				0.533766
222.713									0.478773	0.506033
222.865
226.127	0.528677			0.525461
226.285					0.525489						0.519473
226.436		0.502148				0.515375
226.587			0.521358				0.510177
226.739									0.486952	0.503542
226.889
230.152	0.515637			0.518822
230.301					0.55704						0.502303
230.461		0.510779				0.519871
230.611			0.514911				0.509988
230.762									0.477376	0.506112
230.913
234.186	0.496583			0.526146
234.334					0.533235						0.502168
234.486		0.503791				0.53252
234.646			0.516596				0.511744
234.797									0.464341	0.503148
234.948
238.191	0.533346			0.517268
238.348					0.537395						0.514661
238.499		0.519404				0.540535
238.651			0.532297				0.511758
238.811									0.466481	0.514634
238.962
242.225	0.517523			0.515162
242.373					0.532677						0.507534
242.533		0.510645				0.527538
242.685			0.51545				0.496931
242.835									0.460938	0.502819
242.986
246.289	0.516943			0.515649
246.437					0.533518						0.504856
246.589		0.499509				0.522504
246.749			0.521835				0.516778
246.9									0.480472	0.493342
247.051
250.354	0.537001			0.527479
250.512					0.543576						0.507676
250.664		0.511208				0.516785
250.824			0.519789				0.517841
250.974									0.477557	0.48963
251.125
254.398	0.509037			0.517698
254.556					0.521624						0.505911
254.707		0.514757				0.51011
254.858			0.522425				0.508112
255.019									0.478606	0.512175
255.17
258.422	0.528977			0.516222
258.57					0.536193						0.511903
258.721		0.498077				0.50926
258.872			0.509453				0.508367
259.024									0.475454	0.525803
259.184
262.447	0.521877			0.510876
262.605					0.542616						0.506593
262.756		0.517463				0.511742
262.907			0.508037				0.488281
263.057									0.47084	0.541882
263.209
266.491	0.5121			0.518106
266.649					0.53358						0.500816
266.8		0.504073				0.522079
266.951			0.515703				0.50953
267.112									0.475641	0.509304
267.263
270.525	0.513399			0.518463
270.673					0.530962						0.519105
270.825		0.525713				0.525741
270.975			0.514844				0.504459
271.127									0.468823	0.514025
271.287
274.55	0.525089			0.506079
274.709					0.530463						0.532403
274.859		0.511947				0.513663
275.01			0.534139				0.503014
275.161									0.473191	0.518787
275.312
278.565	0.532719			0.531509
278.722					0.546202						0.511901
278.883		0.507265				0.520845
279.034			0.539162				0.518244
279.195									0.464195	0.529833
279.346
282.639	0.507826			0.521481
282.787					0.525937						0.494496
282.938		0.505689				0.505788
283.089			0.498581				0.518943
283.24									0.471415	0.526027
283.401
286.641	0.528092			0.50977
286.801					0.516205						0.516349
286.952		0.52136				0.51452
287.103			0.521705				0.512266
287.254									0.451157	0.523375
287.405
290.668	0.516905			0.517525
290.825					0.535566						0.518088
290.989		0.529217				0.523162
291.137			0.522645				0.500273
291.298									0.476468	0.504776
291.449
294.702	0.525239			0.524009
294.849					0.526688						0.505001
295.001		0.532717				0.524296
295.161			0.518759				0.517697
295.313									0.483086	0.522204
295.473
298.726	0.533799			0.509495
298.884					0.540843						0.516838
299.035		0.512868				0.501874
299.187			0.513285				0.509702
299.337									0.454075	0.520833
299.488
302.718	0.527672			0.51593
302.869					0.520819						0.495903
303.029		0.51635				0.514268
303.18			0.51639				0.515041
303.331									0.460035	0.532235
303.493
306.755	0.531268			0.528546
306.903					0.51068						0.52512
307.055		0.525043				0.513749
307.214			0.523593				0.512152
307.365									0.469788	0.498005
307.517
310.789	0.522564			0.515821
310.947					0.534871						0.523036
311.098		0.505031				0.504541
311.249			0.517998				0.521945
311.4									0.47735	0.507331
311.551
314.803	0.525001			0.508948
314.951					0.5381						0.525933
315.112		0.505542				0.513759
315.264			0.499832				0.525461
315.414									0.470946	0.529043
315.565
318.838	0.505081			0.504257
318.985					0.538465						0.521786
319.137		0.534036				0.492825
319.297			0.511238				0.503515
319.449									0.464691	0.513879
319.599
322.852	0.507628			0.489584
323.011					0.513551						0.50952
323.161		0.489726				0.506274
323.312			0.510642				0.50772
323.473									0.474395	0.498831
323.624
326.897	0.513928			0.508173
327.044					0.542703						0.501448
327.205		0.487339				0.504304
327.356			0.504333				0.501552
327.507									0.483087	0.506274
327.658
330.911	0.532668			0.509356
331.059					0.525448						0.538018
331.209		0.515908				0.49188
331.37			0.512921				0.507556
331.522									0.478845	0.509476
331.673
334.915	0.50628			0.512439
335.074					0.540976						0.497142
335.224		0.502185				0.510971
335.375			0.507051				0.529054
335.536									0.480006	0.490163
335.686
338.939	0.530775			0.511754
339.087					0.548463						0.503111
339.239		0.522174				0.50037
339.389			0.512773				0.511229
339.54									0.474551	0.496567
339.701
342.954	0.510979			0.494934
343.111					0.523378						0.494464
343.262		0.509085				0.502826
343.414			0.503027				0.505708
343.564									0.478525	0.505794
343.715
346.958	0.509134			0.513697
347.116					0.540213						0.512823
347.277		0.514958				0.510741
347.428			0.52365				0.511556
347.579									0.478277	0.507997
347.729
350.982	0.509799			0.508127
351.13					0.530573						0.522897
351.282		0.50719				0.501963
351.442			0.498854				0.494926
351.593									0.481418	0.494779
351.744
351.593
351.744
[truncated: 2 more columns]

## Sheet: time resolved anisotropy
Fig. 4a
ns	PKC-mCit-egta	PKC-mCit-cal	PKC-mCit-lipid eg	PKC-mCit-lipid cal	mCit-PKC-eg	mCit-PKC-cal
0.58549	0.382697	0.380333	0.403976	0.35488	0.403152	0.399599
0.70259	0.379424	0.378109	0.39897	0.344774	0.398091	0.395984
0.81968	0.37343	0.371088	0.397991	0.341606	0.395947	0.389219
0.93678	0.371944	0.373756	0.391974	0.327634	0.39434	0.392449
1.05388	0.370186	0.370466	0.394089	0.325608	0.385405	0.388034
1.17098	0.370199	0.369792	0.390158	0.3125	0.384267	0.381864
1.28807	0.368543	0.373236	0.388258	0.317884	0.386636	0.381336
1.40517	0.361906	0.364688	0.388335	0.307615	0.381288	0.381214
1.52227	0.368388	0.365768	0.383937	0.304585	0.382023	0.379823
1.63937	0.363318	0.361087	0.386666	0.297825	0.378048	0.378107
1.75647	0.360228	0.365804	0.379612	0.298916	0.378851	0.376716
1.87356	0.352885	0.356819	0.374668	0.293091	0.373407	0.375134
1.99066	0.350273	0.358971	0.379093	0.287003	0.3752	0.368521
2.10776	0.358568	0.354434	0.373435	0.286044	0.372866	0.372697
2.22486	0.353963	0.352451	0.373896	0.287144	0.372994	0.37249
2.34195	0.353079	0.355935	0.371949	0.279951	0.369833	0.365851
2.45905	0.354456	0.354983	0.366149	0.276176	0.366788	0.365937
2.57615	0.345904	0.352747	0.369007	0.272248	0.367507	0.365762
2.69325	0.343618	0.354188	0.366363	0.271976	0.369787	0.363179
2.81034	0.346941	0.351728	0.367247	0.267595	0.364099	0.365272
2.92744	0.344258	0.345932	0.363336	0.269177	0.365454	0.363812
3.04454	0.338819	0.336765	0.360567	0.26204	0.356479	0.363566
3.16164	0.337991	0.343671	0.365749	0.265628	0.360553	0.355546
3.27874	0.337808	0.340692	0.358668	0.260521	0.354656	0.360273
3.39583	0.336792	0.341042	0.356002	0.262744	0.357423	0.357908
3.51293	0.33076	0.339422	0.359445	0.256619	0.35592	0.355821
3.63003	0.333838	0.335877	0.351488	0.253345	0.355469	0.352721
3.74713	0.340851	0.337932	0.353419	0.24628	0.355463	0.349277
3.86422	0.325245	0.336063	0.351795	0.253626	0.356213	0.348199
3.98132	0.332485	0.33767	0.352255	0.23957	0.352093	0.350783
4.09842	0.333956	0.335519	0.354185	0.248256	0.347319	0.350258
4.21552	0.326974	0.331196	0.345322	0.247559	0.347797	0.350003
4.33261	0.32431	0.333467	0.3475	0.243984	0.343071	0.343229
4.44971	0.323439	0.325252	0.349417	0.24204	0.346278	0.344186
4.56681	0.3228	0.323795	0.335647	0.248421	0.342461	0.350077
4.68391	0.321844	0.327131	0.345878	0.244671	0.347315	0.344267
4.80101	0.324281	0.328033	0.343088	0.243396	0.344776	0.340983
4.9181	0.320301	0.32176	0.33957	0.234823	0.340808	0.334513
5.0352	0.320074	0.328195	0.342531	0.234399	0.345637	0.331673
5.1523	0.320343	0.309853	0.332718	0.22703	0.341057	0.334355
5.2694	0.316105	0.317088	0.328227	0.23617	0.343348	0.331323
5.38649	0.317608	0.323188	0.337326	0.226392	0.334545	0.339679
5.50359	0.310953	0.311674	0.333287	0.231108	0.334206	0.336902
5.62069	0.318333	0.317989	0.33761	0.226193	0.340902	0.341865
5.73779	0.311813	0.31302	0.332638	0.227452	0.333185	0.33428
5.85488	0.307954	0.311352	0.324539	0.235554	0.33289	0.335867
5.97198	0.302911	0.317172	0.32829	0.222688	0.332223	0.334766
6.08908	0.311502	0.31378	0.32833	0.215255	0.328128	0.334328
6.20618	0.306063	0.311046	0.331058	0.222274	0.329547	0.327531
6.32328	0.307593	0.304129	0.323218	0.227567	0.327826	0.330335
6.44037	0.305217	0.309355	0.320543	0.222747	0.327578	0.328541
6.55747	0.299258	0.305735	0.329819	0.223254	0.32637	0.31727
6.67457	0.307855	0.307602	0.325875	0.223734	0.326616	0.324098
6.79167	0.309434	0.312731	0.324118	0.213642	0.315395	0.329707
6.90876	0.306349	0.307594	0.32001	0.215891	0.323579	0.311684
7.02586	0.298481	0.298666	0.314154	0.213309	0.324016	0.324042
7.14296	0.294276	0.302297	0.319038	0.224084	0.321959	0.323633
7.26006	0.287371	0.312285	0.31639	0.215744	0.330063	0.318238
7.37715	0.29584	0.306623	0.317057	0.214092	0.320873	0.320285
7.49425	0.286668	0.298098	0.320907	0.209212	0.313363	0.313139
7.61135	0.299158	0.300184	0.315225	0.209462	0.318789	0.319085
7.72845	0.297582	0.299568	0.318997	0.215916	0.320905	0.303301
7.84555	0.285131	0.285601	0.311043	0.206615	0.309066	0.307291
7.96264	0.286235	0.301361	0.321429	0.21478	0.313065	0.313693
8.07974	0.297248	0.297969	0.310324	0.204592	0.311301	0.319421
8.19684	0.289013	0.289215	0.320035	0.206831	0.311319	0.315535
8.31394	0.29519	0.280607	0.308053	0.200906	0.304246	0.310263
8.43103	0.267668	0.293001	0.305948	0.214446	0.299982	0.304526
8.54813	0.290532	0.295375	0.30735	0.201562	0.303705	0.312097
8.66523	0.280729	0.30712	0.310094	0.194588	0.303027	0.316878
8.78233	0.294167	0.283835	0.30312	0.200753	0.305147	0.306852
8.89942	0.28256	0.291317	0.294985	0.193905	0.302713	0.321575
9.01652	0.291962	0.27575	0.302455	0.209241	0.310113	0.303263
9.13362	0.279323	0.291166	0.305282	0.191193	0.313784	0.304547
9.25072	0.269335	0.282545	0.30317	0.188432	0.305708	0.313727
9.36782	0.270278	0.283183	0.306216	0.211985	0.303723	0.294123
9.48491	0.273423	0.300092	0.293551	0.195189	0.290641	0.307018
9.60201	0.27649	0.271788	0.305009	0.19281	0.289018	0.299496
9.71911	0.281417	0.269817	0.29876	0.196548	0.304562	0.308434
9.83621	0.284122	0.286625	0.293085	0.18155	0.296655	0.296736
9.9533	0.27115	0.273144	0.29516	0.187888	0.291243	0.290138
10.0704	0.269927	0.272621	0.277311	0.200578	0.301687	0.307357
10.1875	0.273143	0.263211	0.302192	0.197589	0.29919	0.294507
10.3046	0.27974	0.265822	0.290867	0.187303	0.296641	0.297731
10.4217	0.273772	0.274481	0.297168	0.177498	0.285217	0.302376
10.5388	0.256429	0.264167	0.297343	0.190455	0.29992	0.303957
10.6559	0.270041	0.275189	0.300298	0.18761	0.297024	0.326175
10.773	0.268627	0.289298	0.290447	0.178477	0.292257	0.304785
10.8901	0.265358	0.281095	0.27942	0.177286	0.296011	0.295578
11.0072	0.26718	0.267482	0.296867	0.189235	0.294072	0.292935
11.1243	0.271566	0.280771	0.296557	0.190642	0.288174	0.282931
11.2414	0.255149	0.274148	0.293657	0.179482	0.278425	0.303903
11.3585	0.250713	0.27125	0.283389	0.17986	0.311029	0.297726
11.4756	0.268876	0.259992	0.291472	0.171237	0.280562	0.291936
11.5927	0.266641	0.280423	0.277808	0.197193	0.283935	0.307486
11.7098	0.255066	0.295438	0.27064	0.179973	0.286256	0.294822
11.8269	0.253015	0.260928	0.292852	0.218525	0.288093	0.291972
11.944	0.256918	0.280628	0.281608	0.200803	0.289319	0.270494
12.0611	0.274659	0.261233	0.309402	0.180251	0.292315	0.294672
12.1782	0.251106	0.228094	0.275252	0.179095	0.279988	0.302792
12.2953	0.258122	0.270166	0.277498	0.171474	0.279558	0.311501
12.4124	0.275989	0.257441	0.297986	0.181585	0.287793	0.302723
12.5295	0.263984	0.256505	0.296075	0.17398	0.2872	0.283665
12.6465	0.255024	0.260056	0.279293	0.209135	0.276507	0.281942
12.7637	0.2512	0.267367	0.284073	0.188655	0.276662	0.276883
12.8808	0.261972	0.249828	0.29456	0.200758	0.275296	0.28592
12.9978	0.264761	0.253922	0.278166	0.17466	0.275889	0.306498
13.1149	0.257528	0.263014	0.286876	0.140986	0.272984	0.270462
13.232	0.222236	0.264134	0.287997	0.173601	0.298375	0.287435
13.3491	0.247173	0.258452	0.269285	0.169643	0.263654	0.268831
13.4662	0.234845	0.2535	0.277458	0.178849	0.299187	0.271072
13.5833	0.252051	0.245195	0.259255	0.172483	0.29233	0.282235
13.7004	0.244942	0.241101	0.266749	0.176437	0.28797	0.265943
13.8175	0.245523	0.271348	0.282876	0.194977	0.240728	0.302228
13.9346	0.253683	0.266107	0.249279	0.19172	0.264152	0.287899
14.0517	0.25028	0.239361	0.277722	0.17093	0.241673	0.275998
14.1688	0.235823	0.250631	0.264338	0.156346	0.269606	0.265712
14.2859	0.26193	0.247547	0.275097	0.170569	0.276033	0.273198
14.403	0.24858	0.260341	0.267826	0.192798	0.253494	0.296547
14.5201	0.262757	0.26436	0.277378	0.174222	0.275247	0.259495
14.6372	0.247538	0.261824	0.269084	0.166586	0.25638	0.30713
14.7543	0.267501	0.224656	0.256106	0.175118	0.251012	0.266197
14.8714	0.23402	0.272844	0.26373	0.209944	0.252473	0.284043
14.9885	0.239284	0.277727	0.254726	0.163777	0.271174	0.303484
